1 **Paratype: A genotyping framework and an open-source tool for *Salmonella***

2 **Paratyphi A**

3 Arif M. Tanmoy<sup>1,2\*</sup>, Yogesh Hooda<sup>1,3\*</sup>, Mohammad S. I. Sajib<sup>1,4</sup>, Kesia E. da Silva<sup>5</sup>, Junaid  
4 Iqbal<sup>6</sup>, Farah N. Qamar<sup>6</sup>, Stephen P. Luby<sup>5</sup>, Gordon Dougan<sup>7</sup>, Zoe A. Dyson<sup>7,8,9,12</sup>, Stephen  
5 Baker<sup>8</sup>, Denise O. Garrett<sup>10</sup>, Jason R. Andrews<sup>5</sup>, Samir K. Saha<sup>1,11, \$</sup>, Senjuti Saha<sup>1, \$, #</sup>

6

7 <sup>1</sup> Child Health Research Foundation, Dhaka, Bangladesh. [arif.tanmoy@chrfd.org](mailto:arif.tanmoy@chrfd.org),  
8 [yhooda@chrfd.org](mailto:yhooda@chrfd.org), [saijul.sajib@chrfd.org](mailto:saijul.sajib@chrfd.org), [samir@chrfd.org](mailto:samir@chrfd.org), [senjutisaha@chrfd.org](mailto:senjutisaha@chrfd.org)

9 <sup>2</sup> Department of Medical Microbiology and Infectious Diseases, Erasmus University Medical  
10 Center, Rotterdam, the Netherlands.

11 <sup>3</sup> MRC-Laboratory Molecular Biology, Cambridge, UK.

12 <sup>4</sup> Institute of Biodiversity, Animal Health and Comparative Medicine, University of Glasgow,  
13 Glasgow, UK.

14 <sup>5</sup> Division of Infectious Diseases and Geographic Medicine, Stanford University School of  
15 Medicine, Stanford, California, USA. [kesiaeds@stanford.edu](mailto:kesiaeds@stanford.edu), [sluby@stanford.edu](mailto:sluby@stanford.edu),  
16 [jandr@stanford.edu](mailto:jandr@stanford.edu)

17 <sup>6</sup> Department of Paediatrics and Child Health, Aga Khan University, Karachi, Pakistan.  
18 [junaid.iqbal@aku.edu](mailto:junaid.iqbal@aku.edu), [farah.qamar@aku.edu](mailto:farah.qamar@aku.edu)

19 <sup>7</sup> Wellcome Trust Sanger Institute, Hinxton, Cambridge CB10 1SA, UK.  
20 [gd312@medschl.cam.ac.uk](mailto:gd312@medschl.cam.ac.uk)

21 <sup>8</sup> Cambridge Institute of Therapeutic Immunology and Infectious Disease, Department of  
22 Medicine, University of Cambridge, Cambridge, United Kingdom.  
23 [sgb47@medschl.cam.ac.uk](mailto:sgb47@medschl.cam.ac.uk)

24 <sup>9</sup> Department of Infection Biology, London School of Hygiene and Tropical Medicine,  
25 London, UK. [Zoe.Dyson@lshtm.ac.uk](mailto:Zoe.Dyson@lshtm.ac.uk)

26 <sup>10</sup> Applied Epidemiology Team, Sabin Vaccine Institute, Washington, DC, USA.  
27 [Denise.Garrett@Sabin.org](mailto:Denise.Garrett@Sabin.org)

28 <sup>11</sup> Department of Microbiology, Bangladesh Institute of Child Health, Dhaka Shishu Hospital,  
29 Dhaka, Bangladesh.

30 <sup>12</sup> Department of Infectious Diseases, Central Clinical School, Monash University,  
31 Melbourne, Victoria 3004, Australia.  
32

33 \*, <sup>\$</sup> Equal contribution;

34 # Corresponding author

35

36

37

38

39

40

41

42

43

44

45

46

47

48

49

50

51 **Abstract**

52 **Background:** *Salmonella enterica* serovar Paratyphi A (*Salmonella* Paratyphi A) is the  
53 primary causative agent of paratyphoid fever, which is responsible for an estimated 3.4  
54 million infections annually. However, little genomic information is available on population  
55 structure, antimicrobial resistance (AMR), and spatiotemporal distribution of the pathogen.  
56 With rising antimicrobial resistance and no licensed vaccines, genomic surveillance is  
57 important to track the evolution of this pathogen and monitor transmission.

58 **Results:** We performed whole-genome sequencing of 817 *Salmonella* Paratyphi A isolates  
59 collected from Bangladesh, Nepal, and Pakistan and added publicly available 562 genomes to  
60 build a global database representing 37 countries, covering 1917-2019. To track the evolution  
61 of *Salmonella* Paratyphi A, we used the existing lineage scheme, developed earlier based on a  
62 small dataset, but certain sub-lineages were not homologous, and many isolates could not be  
63 assigned a lineage. Therefore, we developed a single nucleotide polymorphism based  
64 genotyping scheme, Paratype, a tool that segregates *Salmonella* Paratyphi A into three  
65 primary and nine secondary clades, and 18 genotypes. Each genotype has been assigned a  
66 unique allele definition located on a conserved gene. Using Paratype, we identified genomic  
67 variation between different sampling locations and specific AMR markers, and mutations in  
68 the O2-polysaccharide synthesis locus, a candidate for vaccine development.

69 **Conclusions:** This large-scale global analysis proposes the first genotyping tool for  
70 *Salmonella* Paratyphi A. Paratype has already been released ([https://github.com/CHRF-](https://github.com/CHRF-Genomics/Paratype)  
71 [Genomics/Paratype](https://github.com/CHRF-Genomics/Paratype)) as an open-access, command-line tool and is being adopted for large  
72 scale genomic analysis. This tool will assist future genomic surveillance and help inform  
73 prevention and treatment strategies.

74

75 **Keywords:** *Salmonella* Paratyphi A; Paratyphoid fever; Paratyphi A genotyping; Genomics;  
76 Antimicrobial resistance; Global analysis; Epidemiology; Enteric fever; Neglected tropical  
77 disease.

78

79

80

81

82

83

84

85

86

87

88

89

90

91

92

93

94

95

96 **Background**

97 Paratyphoid fever, caused by *Salmonella enterica* subspecies *enterica* serovar Paratyphi A  
98 (*Salmonella* Paratyphi A) is a systemic febrile illness that affects an estimated 3.4 million  
99 people each year, and causes 19,100 deaths globally [1]. The disease is clinically  
100 indistinguishable from typhoid fever, caused by *Salmonella enterica* subspecies *enterica*  
101 serovar Typhi (*Salmonella* Typhi). Much like typhoid, paratyphoid fever is also endemic in  
102 many low- and middle-income countries of South Asia and Sub-Saharan Africa, due to fecal  
103 contamination of water, food and the environment. However, barring a few countries (e.g.,  
104 China, Myanmar), paratyphoid fever is usually less prevalent than typhoid fever [2,3].  
105 *Salmonella* Paratyphi A continues to be an inadequately studied pathogen [4] hampering the  
106 implementation of evidence-based policies for the treatment and prevention of paratyphoid  
107 fever.

108

109 Relative to *Salmonella* Typhi, little genomic information is available on population structure,  
110 antimicrobial resistance (AMR), and spatiotemporal distribution of *Salmonella* Paratyphi A.  
111 The first *Salmonella* Paratyphi A genome was published in 2004 and had a size of 4.5 Mb,  
112 with ~4,200 genes. To determine the global diversity of *Salmonella* Paratyphi A isolates,  
113 Bayesian analysis was conducted on a set of 149 *Salmonella* Paratyphi A genomes, which  
114 identified that the last common ancestor of all *Salmonella* Paratyphi A existed for at least 450  
115 years prior to differentiating into at least seven distinct lineages (A to G) which have  
116 circulated globally [5]. Whole genome sequencing was also used to characterize clonal  
117 paratyphoid outbreaks in Cambodia [6] and China [7] and further extend the lineage scheme  
118 to include sub-lineages within Lineage A and C. However, very few studies have  
119 characterized isolates from countries in South Asia, which contributes over 80% of all  
120 paratyphoid infections [8,9]. Available studies are sporadic, and either focused on genomes

121 from a specific geographical location or provide no information on antimicrobial resistance  
122 markers, potential vaccine targets, and other virulence factors.

123

124 To address this data gap, we performed whole-genome sequencing of 817 *Salmonella*  
125 Paratyphi A isolates collected from Bangladesh, Nepal, and Pakistan and combined them  
126 with whole-genome sequence data of another 562 isolates reported in the literature to build a  
127 global database of 1,379 *Salmonella* Paratyphi A isolates. To track the evolution of  
128 *Salmonella* Paratyphi A over a century, we used the existing lineage scheme and found that  
129 certain sub-lineages were not homologous, and many isolates could not be assigned a specific  
130 lineage. This motivated us to develop a single nucleotide polymorphism (SNP) based  
131 genotyping scheme, called Paratype. The scheme is phylogenetically informative and  
132 successfully segregates the global population structure into three primary, seven secondary,  
133 and 18 distinct subclades/genotypes. We also identified the specific antimicrobial resistance  
134 genes, mutations, and plasmids present in *Salmonella* Paratyphi A genomes and correlated  
135 these with the different genotypes.

136

## 137 **Results**

### 138 Whole-genome sequencing and compilation of global *Salmonella* Paratyphi A genomes

139 The Child Health Research Foundation (CHRF) has been conducting typhoid and  
140 paratyphoid fever surveillance in Bangladesh since 1999 and has generated a biobank of  
141 1,123 *Salmonella* Paratyphi A isolates from 1999-2018 [10–12]. We selected 528 of these  
142 isolates, covering all age groups, years of isolation, and hospitalization status  
143 (hospitalized/out-patient), and performed whole-genome sequencing on these isolates  
144 (Additional file 1: Table S1). Of these, 180 *Salmonella* Paratyphi A isolates were collected as

145 part of the Surveillance of Enteric Fever in Asia Project (SEAP, 2014 - 2019) study, a multi-  
146 country international effort to better understand the epidemiology and impact of enteric fever  
147 in South Asia [13]. In addition to Bangladesh, 133 isolates were sequenced from the SEAP  
148 study conducted in Pakistan, and 156 from Nepal.

149

150 To contextualize these genomes, we conducted a literature search to compile all publicly  
151 available *Salmonella* Paratyphi A genomes (for which raw reads were available) to build a  
152 database of 560 additional isolates from 10 studies (Additional file 1: Table S2). Two  
153 reference genomes (ATCC 9150 and AKU\_12601) were also included. The largest dataset  
154 consisted of 254 isolates, published by Public Health England as part of their *Salmonella*  
155 surveillance [8,14]; 164 of these isolates were linked to travel, most commonly to South Asia.  
156 In our study, we assigned these isolates to the countries where the patient acquired the  
157 infection. Our final data, including the genomes we sequenced, consisted of a total of 1,379  
158 isolates from 37 different countries, spanning over 103 years - 1917 to 2019. Most of the  
159 isolates (1,112/ 1,379; 81%) were from countries in South Asia (541 from Bangladesh, 268  
160 from Nepal, 187 from Pakistan and 115 from India). South Asian countries also bear a  
161 disproportionately high burden of paratyphoid fever; of the estimated 3.4 million global  
162 paratyphoid infections in 2019, 2.8 (82%) million are estimated to have occurred in South  
163 Asia [1].

164

165 Following assembly from raw reads, the pan-genome analysis identified 6,983 genes, of  
166 which 4,114 (59% of all genes) were conserved in more than 95% of isolates (Additional file  
167 1: Figure S1). The average genome size was 4.5 Mb with ~4,300 genes, and the pan genome  
168 does not appear to be closed (decay parameter,  $\alpha = 0.67$ ). Overall, 2,550 genes were

169 found to be present in less than 15% of isolates, and these included genes often found in  
170 prophages and other mobile regions, and genes encoding adhesins, antimicrobial resistance  
171 markers, and several hypothetical proteins.

172

### 173 Genotyping scheme for *Salmonella* Paratyphi A

174 To investigate the genomic diversity of *Salmonella* Paratyphi A, we identified 8,346 single  
175 nucleotide polymorphisms (SNPs) in the 1,379 isolates. These were used in RAxML [15] to  
176 generate a Maximum-likelihood phylogenetic tree of the global collection of *Salmonella*  
177 Paratyphi A isolates (Figure 1). A previously reported lineage scheme, proposed for  
178 *Salmonella* Paratyphi A by Zhou et al. [5] and extended by subsequent studies [6,7,9,16,17]  
179 was overlaid on the RAxML tree. This highlighted the insufficiency of the current lineage  
180 scheme to fully capture the diversity of *Salmonella* Paratyphi A present. First, while the  
181 isolates from lineages B & D - G clustered together, several isolates previously assigned to  
182 lineages A and C in the scheme did not. Second, some sequences belonged to clades that  
183 diverged from isolates before the exitance of the most recent common ancestor for lineages A  
184 and B, indicating that these isolates should be considered to be in a different lineage. This  
185 was not surprising considering that when this scheme was devised, there were limited number  
186 of sequenced *Salmonella* Paratyphi A genomes available, particularly from South Asia.

187

188 To build a genotyping scheme based on a larger number of representative samples, first, we  
189 used fastBAPS [18] to generate a potential list of clusters in the RAxML tree (Additional file  
190 1: Figure S2). Next, we selected a set of 315 isolates that included two isolates per year for all  
191 fastBAPS clusters selected randomly and performed phylodynamic analysis using the  
192 Bayesian Evolutionary Analysis by Sampling Trees (BEAST) software [19] (Figure 2). Based



193 on these analyses, we devised a genotyping scheme with three primary clades, nine secondary  
194 clades, and 18 genotypes that have circulated globally in the last 100 years.

195

196 To aid further genomic epidemiological studies, we identified 18 additional alleles  
197 (Additional file 1: Table S3) that are unique to each of the 18 *Salmonella* Paratyphi A  
198 genotypes. These alleles were present in conserved genes involved in essential cellular  
199 functions such as protein synthesis, DNA replication, or metabolism. Identification of these  
200 genotype-specific alleles allowed us to write a Python script – “Paratype” – that assigns  
201 genotypes to *Salmonella* Paratyphi A genomes using fastq, bam, or vcf files obtained during  
202 whole-genome sequencing and variant calling. The Paratype software tool (available at:  
203 <https://github.com/CHRF-Genomics/Paratype/>) has 100% sensitivity and specificity and was  
204 able to assign the correct genotype to all the 1,379 genomes that were present in our database.

205

#### 206 Temporal and geographic distribution of different genotypes

207 Upon the establishment of the “Paratype” scheme, we considered the geographical  
208 distribution of the different genotypes (Figure 3). Genotype 0.1 under primary clade 0 was  
209 phylogenetically unique (matches with lineage H of Zhou et al [5]); there was only one  
210 isolate belonging to this genotype/primary clade that was isolated in Hong Kong in 1971. The  
211 genome of this isolate was distinct from all other genomes obtained thus far, contained 1288  
212 unique SNPs, and may represent a lineage that is now extinct, or present at very low numbers  
213 in areas that have not been sampled. The other two primary clades, clades 1 and 2, emerged  
214 between 1700-1800 and contain genomes that have been collected in the last two decades.  
215 Clade 1 contains strains largely from lineage F, and fastBAPS predicted two sub-clusters  
216 within this clade. One of these clusters was largely found in Bangladesh and has been

217 assigned secondary clade 1.2, then sub-divided into genotypes 1.2.1 and 1.2.2 which appear  
218 to have diverged in the 1950s. Both these genotypes are currently present in Bangladesh and  
219 other South Asian countries (Figure 2). The other cluster with 13 genomes from Bangladesh  
220 that were first isolated in 1999 have been assigned to genotype 1.1. The remaining 10  
221 genomes were obtained between 1917 to 1963 and have been assigned genotype 1.0.

222

223 Most *Salmonella* Paratyphi A genomes (1254/1379; 91%) have been assigned to primary  
224 clade 2, which contains genomes belonging to the lineage A-E of the previous scheme.  
225 Genomes that belonged to lineages B, D, and E have now been assigned to genotypes 2.4,  
226 2.2, and 2.0, respectively. Within genotype 2.0, 13 unique and recent isolates from Pakistan  
227 were identified and have been assigned as genotype 2.0.1. Genotype 2.1 contains isolates  
228 from Nepal that were sampled during the SEAP study, yet the genotype emerged in the 1800s  
229 and is distinct from all other isolates in clade 2. Two clusters in fastBAPS, comprising of  
230 strains largely from what was formerly C lineage are now assigned to genotype 2.3. Genotype  
231 2.3 has been subdivided into genotypes 2.3.1 to 2.3.3, each of which belongs to a distinct  
232 geographical location: 2.3.1 is found predominantly in Cambodia and South-East Asia; 2.3.2  
233 and 2.3.3 are found largely in South Asia. An outbreak of paratyphoid fever in China during  
234 2010 – 2011 [7] was caused by isolates of genotype 2.3.3, and these likely originated in  
235 South Asia. The former lineages A and B have been assigned genotype 2.4, which is further  
236 divided into 2.4.1 to 2.4.4. While genotypes 2.4.1 and 2.4.2 have been observed in different  
237 countries in South Asia, genotype 2.4.4 is predominantly found in Bangladesh, and 2.4.3 is  
238 largely present in Nepal.

239

240 Different countries in South Asia had unique genotype distributions. Predominant genotypes  
241 present in Bangladesh were 2.4.4 (56%) followed by 1.2.2 (14%) and 2.3.3 (13%). In Nepal,  
242 2.4.3 (47%), 2.3.3 (16%) and 2.4.1 (14%) were three most common genotypes. Pakistan had  
243 genotypes 2.3.3 (25%), 2.3 (16%) and 2.4 (15%). In India, genotypes 2.4.2 (22%), 2.4 (20%),  
244 2.4.1 (19%), 2.3.3 (17%), and 2.3 (16%) were commonly identified.

245

#### 246 Antimicrobial resistance markers in *Salmonella* Paratyphi A

247 To characterize genomic determinants of antimicrobial resistance in *Salmonella* Paratyphi A,  
248 we screened the 1,379 genomes for the presence of antimicrobial genes and markers using  
249 ResFinder [20] (Figure 4a) and plasmids using PlasmidFinder [21] (Figure 4b). Of the 1,379  
250 isolates, 1,015 (74%) isolates showed no predicted plasmids and 1356/1379 had no predicted  
251 antimicrobial resistance genes. Five genomes with the IncHI1 plasmid were identified, two  
252 genomes (both from India) contained resistance genes for trimethoprim and chloramphenicol,  
253 and the other three genomes contained genes for trimethoprim, chloramphenicol and  
254 ampicillin designated as MDR isolates (one each from India, Pakistan, and Thailand). All five  
255 genomes belonged to genotype 2.3 and the strains were isolated between 1999-2004. We also  
256 identified a genome belonging to genotype 2.4.4 containing *bla*CTX-M-15 and *bla*TEM-1B  
257 on an IncI1-I plasmid; the originating strain was isolated from a patient who contracted the  
258 infection in Bangladesh in 2017 [22]. There were 14 isolates from the genotype 2.3.1 that  
259 contain *bla*TEM-116, which can lead to resistance to ampicillin; all 14 were reported from  
260 Cambodia[6]. Another isolate from genotype 2.3.3 (from Pakistan, 2015) contained a *qnrB19*  
261 gene on a Col(pHAD28) plasmid, which has been shown to lead to quinolone resistance in  
262 other *Salmonella* species [23].

263

264 In addition to antimicrobial resistance genes, we also identified chromosomal mutations in  
265 the *acrB* gene and the quinolone resistance determining region (QRDR) to identify isolates  
266 resistant to azithromycin and ciprofloxacin respectively. Six of 1,379 genomes contained an  
267 AcrB R717 mutation, all from Bangladesh and these belonged to genotypes 2.3.3 (1/6) and  
268 2.4.4 (5/6) [24,25]. The first azithromycin resistant *Salmonella* Paratyphi A isolate was  
269 identified in 2014, and this resistance has emerged independently at least twice in two  
270 different genotypes. On the other hand, a majority (1177/1397; 84%) of genomes had  
271 mutations in the QRDR region. The most commonly found single mutation was gyrA-S83F  
272 (941/1379), followed by gyrA-S83Y (205/1379). Two isolates contained double mutations in  
273 the QRDR region; one of them belonged to genotype 2.0.1 (gyrA-S83F & D87N, Pakistan,  
274 2017) and another belonged to genotype 2.3.3 (gyrA-S83F & D87G, UK, 2016). Barring  
275 genotype 0.1, 1.0 and 2.2, all other genotypes had at least one genome with a QRDR  
276 mutation (Figure 4c). The first QRDR mutation was identified in 1997 in India in genotype  
277 2.4 and their prevalence have increased over time. In 2012 and 2013, there was an outbreak  
278 in Cambodia caused by a strain from genotype 2.3.1 that did not have any QRDR mutation  
279 leading to a temporary increase in proportion of *Salmonella* Paratyphi A with no QRDR  
280 mutations during these two years (Additional file 1: Figure S3).

281

### 282 Characterization of mutations in the O2-antigen biosynthetic gene cluster

283 The majority of the vaccines being developed for *Salmonella* Paratyphi A use the O2-antigen  
284 that is unique to this serovar conjugated to a carrier protein [26]. Recently, through in-silico  
285 metabolic reconstruction, an 18.9 kb region containing genes involved in O-antigen  
286 biosynthesis was identified as important for determining the specific molecular features of the  
287 O2-antigen found in *Salmonella* Paratyphi A [27]. We identified the SNPs in the O2-antigen  
288 biosynthesis genes found in the 1,379 genomes to investigate the conservation of this

289 genomic loci. In total, 84 SNPs were found, of which 13 were present in more than 10  
290 genomes. The most common SNP was at genomic location 8,68,444 (G> C; synonymous  
291 mutation in *prt* gene encoding paratose synthase), which was found in 17% (239/1,379) of all  
292 isolates. Out of those 13 common SNPs ( $n \geq 10$ ), seven led to non-synonymous mutations  
293 (Additional file 1: Figure S4) that could potentially change the O<sub>2</sub>-antigen structure and  
294 chemistry.

295

## 296 **Discussion**

297 *Salmonella* Paratyphi A is the causative agent of paratyphoid fever, a neglected tropical  
298 disease with a high burden and mortality in low-and-middle-income countries. Limited  
299 information is available regarding its genomic diversity, especially from South Asian  
300 countries that collectively are responsible for over 80% of all paratyphoid cases. As genomic  
301 surveillance becomes more prominent, there is a need for a coherent and easy-to-use scheme  
302 that can be deployed by public health researchers that do not require extensive compute  
303 resources.

304

305 We sequenced 817 isolates from Bangladesh, Pakistan and Nepal collected over the last 20  
306 years and compiled a collection of all genomes of *Salmonella* Paratyphi A publicly available  
307 thus far. We describe a genotyping framework for *Salmonella* Paratyphi A using 1,379  
308 isolates obtained from 1917 through 2019. Rather than being guided by a single approach, we  
309 combined ML-based phylogenetics with BAPS and Bayesian analysis via BEAST to design a  
310 genotyping scheme for *Salmonella* Paratyphi A. The scheme divided the *Salmonella*  
311 Paratyphi A population into 18 different genotypes, and each can be identified by the  
312 presence of an allele that is located on the coding sequence of a conserved gene, involved in

313 housekeeping functions. We only found 8,346 SNPs from all 1,379 isolates, with minimal  
314 recombination, and thus, this genotyping scheme based on SNP alleles can support robust  
315 genotyping and accommodate future evolution of *Salmonella* Paratyphi A. And to assist with  
316 that, we have developed Paratype, an open-source Python script for genotyping of *Salmonella*  
317 Paratyphi A genomes. Paratype can detect the genotype of *Salmonella* Paratyphi A genomes  
318 directly from raw fastq read data. It can also detect mutations in the *acrB* efflux pump  
319 (determinant of macrolide resistance) and in the QRDR region (determinant of ciprofloxacin  
320 non-susceptibility).

321

322 In this genotyping scheme, we propose three primary clades 0, 1, and 2, which diverged  
323 before the 1800s (Figure 2). While only a single isolate of primary clade 0 was obtained in  
324 1971, isolates belonging to clade 1 and 2 have been routinely identified over the past two  
325 decades. Clade 2 is the most abundant and has been subdivided into four secondary clades:  
326 2.1 - 2.4, which probably emerged in the 1800s or the early 1900s. Clade 2.3 could be  
327 subdivided into 2.3.1 - 2.3.3, each with distinct geographic distribution. Clade 2.4 was also  
328 sub-divided into genotypes 2.4.1 - 2.4.4. Genotype 2.4.4 was the most abundant and was  
329 predominantly present in Bangladesh. This genotype emerged in the late 1990s to early 2000s  
330 and possesses high rates of ciprofloxacin resistance (Figure 2). Five of the isolates from this  
331 genotype also contained *AcrB*-R717Q mutation that leads to azithromycin resistance, while  
332 one was found to harbor a plasmid containing extended-spectrum beta-lactamase gene  
333 (*bla*CTX-M-15) [22].

334

335 In line with findings of previous studies, the rates of acquisition of antimicrobial resistance  
336 markers in *Salmonella* Paratyphi A is lower relative to *Salmonella* Typhi (Figure 4) [6,9].

337 Although a few isolates did acquire the IncHI1 plasmid in the late 1990s to early 2000s  
338 (Figure 4a), no massive spread across the globe was noted; this unlike *Salmonella* Typhi  
339 lineage H58 (genotype 4.3.1) carrying the IncHI1 plasmid spread and became the dominant  
340 lineage in the last 30 years[28]. This is also true for chromosomal mutations such as QRDR  
341 and AcrB mutations, which are overall less prevalent in *Salmonella* Paratyphi A than in  
342 *Salmonella* Typhi [28,29]. Considering the genetic similarities between *Salmonella* Typhi  
343 and Paratyphi A, and the fact that they occupy the same environmental niche, the differences  
344 in the presence of AMR genes between these typhoidal *Salmonella* serovars warrants further  
345 investigation.

346

347 The specific O-antigen in the *Salmonella* Paratyphi A is thought to be conserved (assigned to  
348 serogroup O2) and several vaccine candidates are currently under development, utilizing the  
349 O2 antigen conjugated to a carrier protein as the main vaccine antigen. We compared the 18.9  
350 kbp region responsible for the synthesis of the O2 antigen in this serovar [27] and found 83  
351 SNPs in this region, of which 7 non-synonymous mutations were present in >10 isolates.  
352 While it is not clear if these mutations affect the O2-antigen chemistry, the low mutation rate  
353 and no observed recombination events in the cluster suggests that the O2 antigen vaccine will  
354 have a broadly protective response against all the *Salmonella* Paratyphi A genotypes sampled  
355 thus far. However, any variations in this region should be carefully monitored through  
356 genomic surveillance.

357

358 The conclusions that we can draw from this analysis are subject to certain limitations. First,  
359 the available genomes are an incomplete sample; *Salmonella* Paratyphi A is a neglected  
360 pathogen, and hence the available genomes and might not have broad representativeness

361 across geographies or time. Specifically, a small proportion of genomes were available from  
362 countries in sub-Saharan Africa and India. Second, while the tool has high sensitivity and  
363 specificity on our dataset, as more genomes become available over time and novel  
364 mechanism of AMR emerge, this tool will require updates from the bigger scientific  
365 community. Like all genotyping tools, Paratype is a living tool that will require updates. Our  
366 diverse group of authors plans to continually monitor the library of publicly available  
367 genomes, accept update requests via GitHub, and incorporate any required updates in the  
368 Paratype scheme accordingly.

369

## 370 **Conclusions**

371 This study reports the first large-scale global analysis of *Salmonella* Paratyphi A genomes  
372 and proposes the first genotyping tool for this pathogen. Paratype, which has already been  
373 released (<https://github.com/CHRF-Genomics/Paratype>) as an open-access, easy-to-use,  
374 command-line tool, is being tested and adopted by researchers for large scale genomic  
375 analysis (<https://doi.org/10.5281/zenodo.5520408>). This tool will assist future genomic  
376 surveillance studies and will help inform prevention and treatment strategies for this  
377 neglected pathogen.

378

## 379 **Methods**

### 380 **Study site and isolate selection**

381 Child Health Research Foundation in Bangladesh has been preserving invasive *Salmonella*  
382 isolates since 1999 and maintains a biobank of >9000 typhoidal *Salmonella* isolates, largely  
383 from children (<18□ years of age) that were isolated from the blood of the patients in two  
384 different settings: in-patient (hospitalized), and out-patient (community) facility [30]. Clinical



385 and epidemiological data were collected for all hospitalized patients. From this biobank,  
386 among 640 *Salmonella* Paratyphi A isolates collected till December 2016, 348 were  
387 randomly selected for whole-genome sequencing (WGS) (Additional file 1: Table S1). A set  
388 of 469 *Salmonella* Paratyphi A isolates were also added to this collection, isolated under the  
389 Surveillance for Enteric Fever in Asia (SEAP) project from three different typhoid-endemic  
390 countries, Bangladesh (n= 180), Nepal (n= 156), and Pakistan (n=133). The SEAP-  
391 Bangladesh isolates (n=180) were selected using randomization to represent 483 isolates  
392 collected between 2016 and 2018. In contrast, SEAP-Nepal isolates included all pre-SEAP  
393 isolates (2014 – 2016) and randomly selected SEAP isolates (2017 – 2019). The SEAP-  
394 Pakistan isolates were selected prioritizing the availability of geographic information and  
395 susceptibility profile during 2016 – 2018.

396

397 To add to all the isolates sequenced in this study, we also collected raw fastq data of 560  
398 *Salmonella* Paratyphi A isolates from 37 different countries and 10 published articles  
399 (Additional file 1: Table S2). Complete chromosomal sequences of *Salmonella* Paratyphi A  
400 ATCC 9150 (NC\_006511) and AKU\_12601 (NC\_011147) were also included [31,32]. For  
401 travel-related paratyphoid cases, the country of “traveling from” was considered as the  
402 country of origin. If no travel data is available, the country of “reported from” was considered  
403 as the country. Overall, for globally distributed 562 *Salmonella* Paratyphi A, year and country  
404 data were available for 507 and 536 respectively (Additional file 1: Table S2). In total, we  
405 obtained a global collection of 1,379 *Salmonella* Paratyphi A covering a timeline of 1917 –  
406 2019 and 37 countries [see Additional file 2 for more details].

407

408 Whole-genome sequencing

409 *Salmonella* Paratyphi A isolates from 1999-2016 (before the start of the SEAP project) from  
410 Bangladesh (n=348) were subcultured on MacConkey agar media and kept overnight at 37°C.  
411 In case of any visible contamination, a single colony was picked and subcultured again.  
412 Later, all colonies were swapped and resuspended into 1 ml of water. From this suspension,  
413 400 µL was used for DNA extraction using the QIAamp DNA Mini Kit (Qiagen, Hilden,  
414 Germany) and sent to Novogene (NovogeneAIT, Singapore) for WGS on Novaseq 6000  
415 platform (PE150). All SEAP isolates were extracted using the same protocol and were  
416 sequenced on Illumina HiSeq 4000 platform (PE150) at the Wellcome Sanger Institute,  
417 Cambridge, UK.

418

#### 419 Systematic literature review of existing *Salmonella* Paratyphi A genomes

420 To contextualize the genomes sequenced in this study, we conducted a systematic search to  
421 compile all publicly available *Salmonella* Paratyphi A genomes (for which raw reads and  
422 metadata were available) to build a database of 560 additional isolates from 10 studies  
423 (Additional file 1: Table S2). First, the search terms “(Salmonella Paratyphi A) AND  
424 (Molecular Epidemiology)” “Salmonella Paratyphi A genome” and “(Salmonella Paratyphi  
425 A) AND (Genomic Epidemiology)” were used in PubMed advanced search builder. Next, the  
426 hits were filtered by selecting dates between 1900 and 2019 and the total number of  
427 publications remaining were 231. After screening the abstracts and titles manually and  
428 eliminating duplicated, only 7 studies were found to have any kind of genome/metadata  
429 available for further analysis. In addition, three studies [8,9,22] that meets our criteria  
430 (published and both metadata and raw reads available) but missed/not published during the  
431 initial PubMed search were incorporated from European Nucleotide Archive (ENA) database,  
432 taking the final number of incorporated publications to 10.

433

434 Quality check, genome assembly, annotation, and pan-genome analysis

435 Raw fastq reads of all *Salmonella* Paratyphi A were quality-checked using FastQC and  
436 trimmed using Trimmomatic if necessary[33]. All 1,377 sets of raw fastq reads were  
437 assembled using Unicycler v0.4.8 (*default with --min\_fasta\_length 200*)[34]. The assembled  
438 contigs (n = 1,377) and downloaded complete chromosomes (n = 2) were annotated using  
439 Prokka (*--gcode 11 --mincontiglen 200*) [35]. The annotated GFF files of all 1,379 isolates  
440 were used to build a pan- and core-genome of *Salmonella* Paratyphi A using Roary v3.3 (  
441 *options: -t 11 -e --mafft -n*)[36]. The gene\_presence\_absence matrix output was used to  
442 perform the Heap's law analysis to understand the open/closedness of the pan-genome (*heaps*  
443 *function of micropan* library on R; 1000 permutations).

444

445 SNP-based phylogenetic analyses

446 For the complete “global+SEAP” raw data collection, fastq reads of 1,377 *Salmonella*  
447 Paratyphi A and fasta of two RefSeq chromosomes (NC\_006511 and NC\_011147) were  
448 mapped against the *Salmonella* Paratyphi A AKU\_12601 (FM200053.1) using Bowtie2  
449 v2.3.5.1 [37]. Candidate SNPs were identified using SAMtools (v1.10) and BCFtools  
450 (v1.10.2) [38]. Only the homozygous, unambiguous SNPs with a Phred-quality score of >20  
451 were selected using a customized Python script. SNPs were discarded if they had strand bias  
452  $p < 0.001$ , mapping bias  $p < 0.001$  or tail bias  $p < 0.001$  (using *vcfutils.pl* script, from  
453 SAMtools). SNPs located in phage or repeat regions (118.9 kb for *Salmonella* Paratyphi A  
454 AKU\_12601 as described in Sajib et al. [25]) were also excluded using a customized python  
455 script. Gubbins v2.3.4 was used to detect the recombinant regions [39] and SNPs in those  
456 regions were excluded as well using the same python script, resulting in a set of 8,346

457 chromosomal SNPs positions for the “global+SEAP” collection (n= 1,379). All SNP alleles  
458 were extracted (fasta) using a customized python script and merged to produce SNP  
459 alignment.

460

461 Maximum likelihood trees (MLT) were built from the chromosomal SNP alignments using  
462 RAxML v8.2.12 (with the Generalized Time-Reversible model and a Gamma distribution to  
463 model site-specific rate variation; GTRGAMMA in RAxML) [15]. Support for the MLT was  
464 calculated using 100 bootstrap pseudo-analyses of the alignment. The MLT was outgroup-  
465 rooted by including the pseudo-alleles from *Salmonella* Typhi CT18 (NC\_003198.1) in the  
466 alignment. Tree visualization was done using iTol v5.5 [40], including the previous Paratyphi  
467 A lineages proposed by Zhou *et al* [5].

468

#### 469 Bayesian analysis and identifying phylogenetically informative clades and subclades

470 In addition to SNP-based MLT, we investigated the population structure of the global  
471 *Salmonella* Paratyphi A collection using a Bayesian approach, implemented with the SNP  
472 alignment using fastBaps<sup>40</sup>. To maintain compatibility with the phylogeny, some minor  
473 modifications were made to the clustering pattern proposed by the least conservative  
474 Dirichlet prior hyperparameters on fastbaps, *optimise.baps*. This eventually resulted in a total  
475 of 16 different clusters. A customized python script was used to randomly select two  
476 isolates/year/cluster to represent this global collection of *Salmonella* Paratyphi A, leading to  
477 two independent sample sets of 315 isolates each. The alignment of SNP-alleles for this  
478 representative sample set was used to understand the evolutionary diverging pattern of  
479 different *Salmonella* Paratyphi A clusters over time using BEAST v1.10.4 [19]. The  
480 GTR+ $\Gamma$ (4) substitution model was selected for this analysis with the exponential unrelated

481 relaxed clock as clock type and Bayesian skyline coalescent model as tree prior. The analysis  
482 considered the year of isolation as tip dates and continued for 500 million steps with  
483 sampling every 50,000 iterations. The BEAST analysis was run twice each on the two  
484 independently generated sets of isolates. The resulting log files and model parameters were  
485 analyzed on Tracer v1.7.1. TreeAnnotator v1.10 was used to generate the maximum-clade-  
486 credibility (MCC) tree [41]. The tree was visualized on FigTree v1.4.4 with a time scale. For  
487 the model with the highest posterior values (joint effective sample size (ESS) of 544) used for  
488 further analysis, time to last common ancestor (MRCA) was calculated to be 1407 AD (95%  
489 highest posterior density (HPD) interval [721.0, 1637.3]). Based on the diverging patterns  
490 suggested by the MCC tree, we assigned the clusters (defined as described above) into  
491 primary clades, secondary clades, and subclades on the MLT. However, a few visible clusters  
492 on the MLT could not be assigned to specific subclades due to a lack of clustering  
493 information from fastBaps, likely due to the low number of SNPs unique to these clusters.

494

#### 495 SNP-based genotyping scheme and paratype

496 We further divided the 16 clusters obtained from fastBAPS into 18 genotypes and identified a  
497 set of 18 SNP alleles, located in a coding sequence for conserved genes to define each  
498 assigned secondary clade and sub-clades. Each SNP allele was unique to only one subclade  
499 or, to one secondary clade and its corresponding subclades (if any). Therefore, we assigned  
500 the term “genotype” to each of the 18 secondary clades or subclades. Sorted read alignment  
501 (BAM) files generated during the SNP analysis were used to assign the genotypes for each  
502 isolate using a customized Python script, named Paratype (available at  
503 <https://github.com/CHRF-Genomics/Paratype>). Briefly, under BAM mode (*--mode bam*),  
504 Paratype uses *samtools index* (if bam file is not indexed), *samtools mpileup*, and *bcftools call*  
505 to extract the consensus base calls at those 18 SNP loci from the BAM file. The resulting

506 variant call format (VCF) file is then processed to identify the presence of the defining SNP  
507 alleles and follow cladistic logic to assign the genotype of the isolate, as well as the primary  
508 clade, secondary clades, and subclade information. Paratype only considers high-quality SNP  
509 alleles (Phred score >20 and 75% read\_ratio for the allele) to assign genotypes. Read\_ratio is  
510 calculated by the number of high-quality alternative-allele reads on both strands, divided by  
511 the total number of high-quality reads. In addition, Paratype also has fastq mode (*--mode*  
512 *fastq*) where a user can provide a set of paired-end raw fastq data file (can be gzipped) and  
513 Paratype performs reference mapping (against the *Salmonella* Paratyphi AKU\_12601  
514 genome) using Bowtie and SAMtools and follows the same steps described above to detect  
515 the genotype of the isolates. Although the bam mode is the default for the tool, the fastq  
516 mode is more accurate and should be user-friendly to non-coding specializing researchers;  
517 however, it is more time-consuming. Paratype also runs on vcf mode (*--mode vcf*) which is  
518 faster, but also the least accurate if the provided SNPs are not highly trusted.

519

#### 520 Plasmid, resistance gene, and mutation analysis

521 All assembled contigs were screened with PlasmidFinder v2.1 [21] and ResFinder v3.2 [20]  
522 to detect plasmid amplicons and acquired AMR genes respectively. Both results were parsed  
523 using customized python scripts. To detect mutations in *gyrA* and *acrB* genes, we used the  
524 same Paratype script. It uses the same files used for genotyping and produces gene- and  
525 position-specific non-silent and silent mutation results.

526

527 We also explored the genomic region where the genes related to O2-antigen biosynthesis are  
528 located (860,008 – 878,865 of AKU\_12601 genome). We detected all SNPs in that region  
529 with the number of isolates having those and their corresponding amino-acid changes using

530 the Paratype. Two additional python scripts were used to count position-specific SNPs and  
531 mutations for the 18.9 kbp region.

532

### 533 Data visualization and statistical analysis

534 R (v4.0.4) base function and several packages including dplyr, ggplot2, micropan and  
535 scatterpie were used for data visualization and statistical analysis.

536

### 537 **Declarations**

#### 538 Ethics approval and consent to participate

539 Ethical approval for the parent studies were obtained from the Bangladesh Institute of Child  
540 Health Ethical Review Committee, Nepal Health Research Council, Aga Khan University  
541 Hospital Ethics Committee and Pakistan National Ethics Committee, Stanford University  
542 Institutional Review Board, and U.S. Centers for Disease Control and Prevention. Informed  
543 written consent and clinical information were taken from adult participants and legal  
544 guardians of child participants.

545

#### 546 Consent for publication

547 Not applicable (No data from individual person was used for analysis).

548

#### 549 Availability of data and materials

550 The genome dataset supporting the conclusions of this article are available in the European  
551 Nucleotide Archive (ENA) under study accession ERP132884. The genotyping tool for

552 *Salmonella* Paratyphi A, Paratype is available at <https://github.com/CHRF->  
553 [Genomics/Paratype](https://github.com/CHRF-Genomics/Paratype) (<https://doi.org/10.5281/zenodo.5520408>). Customized Python scripts  
554 and color scheme used in the manuscript are available at <https://github.com/CHRF->  
555 [Genomics/CHRF Paratyphi scripts](https://github.com/CHRF-Genomics/CHRF_Paratyphi_scripts). The metadata supporting the conclusions of this article  
556 is included in Additional file 2.

557

#### 558 Competing interests

559 The authors declare no competing interests.

560

#### 561 Funding

562 This study was supported by the Bill and Melinda Gates Foundation (grant numbers INV-  
563 023821 and INV-008335). The funding body did not have any role in the design of the study,  
564 analysis, and interpretation of data or, in writing the manuscript.

565

#### 566 Authors' contributions

567 AMT, YH, MSIS, SKS and SS were involved in conceptualization and design of the study.  
568 MSIS performed the DNA extraction for sequencing in Bangladesh and the literature review  
569 for the global database construction. AMT, YH and MSIS performed bioinformatic analysis  
570 under supervision of SS and SKS. JRA provided continuous guidance during bioinformatic  
571 analysis. AMT and YH designed the genotyping scheme and AMT wrote the Paratype script.  
572 YH and MSIS conducted the statistical analyses and visualization. KES, JI, ZAD, SB and  
573 JRA reviewed the results. ZAD and SB reviewed genotyping scheme and the Paratype tool.  
574 AMT, YH, MSIS and SS wrote the first draft of the manuscript. KES, JI, FNQ, SPL, GD,



575 ZAD, SB, DOG, JRA and SKS reviewed the manuscript. All authors reviewed and approved  
576 the final manuscript.

577

#### 578 Acknowledgements

579 We are thankful to Mr. Hafizur Rahman, Mr. Dipu Chandra Das and Ms. Nusrat Alam of the  
580 Child Health Research Foundation for their help with the wet-lab procedures. We are also  
581 thankful to the entire SEAP team for their unwavering support and coordination between the  
582 teams.

583

#### 584 References

- 585 1. Stanaway JD, Reiner RC, Blacker BF, Goldberg EM, Khalil IA, Troeger CE, et al. The  
586 global burden of typhoid and paratyphoid fevers: a systematic analysis for the Global Burden  
587 of Disease Study 2017. *The Lancet Infectious Diseases* [Internet]. [cited 2019 Feb 28];0.  
588 Available from: [https://www.thelancet.com/journals/laninf/article/PIIS1473-3099\(18\)30685-](https://www.thelancet.com/journals/laninf/article/PIIS1473-3099(18)30685-6/abstract)  
589 [6/abstract](https://www.thelancet.com/journals/laninf/article/PIIS1473-3099(18)30685-6/abstract)
- 590 2. Crump JA, Mintz ED. Global trends in typhoid and paratyphoid fever. *Clin Infect Dis*.  
591 2010;50:241–6.
- 592 3. Lu X, Li Z, Yan M, Pang B, Xu J, Kan B. Regional Transmission of *Salmonella* Paratyphi  
593 A, China, 1998–2012. *Emerg Infect Dis*. 2017;23:833–6.
- 594 4. Furuse Y. Analysis of research intensity on infectious disease by disease burden reveals  
595 which infectious diseases are neglected by researchers. *PNAS. National Academy of*  
596 *Sciences*; 2019;116:478–83.

- 597 5. Zhou Z, McCann A, Weill F-X, Blin C, Nair S, Wain J, et al. Transient Darwinian  
598 selection in *Salmonella enterica* serovar Paratyphi A during 450 years of global spread of  
599 enteric fever. *Proc Natl Acad Sci U S A*. 2014;111:12199–204.
- 600 6. Kuijpers LMF, Le Hello S, Fawal N, Fabre L, Tourdjman M, Dufour M, et al. Genomic  
601 analysis of *Salmonella enterica* serotype Paratyphi A during an outbreak in Cambodia, 2013–  
602 2015. *Microb Genom* [Internet]. 2016 [cited 2019 Aug 25];2. Available from:  
603 <https://www.ncbi.nlm.nih.gov/pmc/articles/PMC5320704/>
- 604 7. Yan M, Yang B, Wang Z, Wang S, Zhang X, Zhou Y, et al. A Large-Scale Community-  
605 Based Outbreak of Paratyphoid Fever Caused by Hospital-Derived Transmission in Southern  
606 China. *PLOS Neglected Tropical Diseases*. Public Library of Science; 2015;9:e0003859.
- 607 8. Ashton PM, Nair S, Peters TM, Bale JA, Powell DG, Painset A, et al. Identification of  
608 *Salmonella* for public health surveillance using whole genome sequencing. *PeerJ*. PeerJ Inc.;  
609 2016;4:e1752.
- 610 9. Britto CD, Dyson ZA, Duchene S, Carter MJ, Gurung M, Kelly DF, et al. Laboratory and  
611 molecular surveillance of paediatric typhoidal *Salmonella* in Nepal: Antimicrobial resistance  
612 and implications for vaccine policy. *PLOS Neglected Tropical Diseases*. 2018;12:e0006408.
- 613 10. Saha S, Islam M, Uddin MJ, Saha S, Das RC, Baqui AH, et al. Integration of enteric fever  
614 surveillance into the WHO-coordinated Invasive Bacterial-Vaccine Preventable Diseases (IB-  
615 VPD) platform: A low cost approach to track an increasingly important disease. *PLOS*  
616 *Neglected Tropical Diseases*. 2017;11:e0005999.
- 617 11. Saha S, Islam M, Saha S, Uddin MJ, Rahman H, Das RC, et al. Designing  
618 Comprehensive Public Health Surveillance for Enteric Fever in Endemic Countries:  
619 Importance of Including Different Healthcare Facilities. *J Infect Dis*. 2018;218:S227–31.

- 620 12. Saha S, Islam MS, Sajib MSI, Saha S, Uddin MJ, Hooda Y, et al. Epidemiology of  
621 Typhoid and Paratyphoid: Implications for Vaccine Policy. *Clin Infect Dis.* 2019;68:S117–  
622 23.
- 623 13. Barkume C, Date K, Saha SK, Qamar FN, Sur D, Andrews JR, et al. Phase I of the  
624 Surveillance for Enteric Fever in Asia Project (SEAP): An Overview and Lessons Learned. *J*  
625 *Infect Dis.* 2018;218:S188–94.
- 626 14. Day MR, Doumith M, Do Nascimento V, Nair S, Ashton PM, Jenkins C, et al.  
627 Comparison of phenotypic and WGS-derived antimicrobial resistance profiles of *Salmonella*  
628 *enterica* serovars Typhi and Paratyphi. *Journal of Antimicrobial Chemotherapy.*  
629 2018;73:365–72.
- 630 15. Stamatakis A. RAxML version 8: a tool for phylogenetic analysis and post-analysis of  
631 large phylogenies. *Bioinformatics.* 2014;30:1312–3.
- 632 16. Britto CD, Dyson ZA, Mathias S, Bosco A, Dougan G, Jose S, et al. Persistent circulation  
633 of a fluoroquinolone-resistant *Salmonella enterica* Typhi clone in the Indian subcontinent.  
634 *Journal of Antimicrobial Chemotherapy.* 2020;75:337–41.
- 635 17. Sherchan JB, Morita M, Matono T, Izumiya H, Ohnishi M, Sherchand JB, et al.  
636 Molecular and Clinical Epidemiology of *Salmonella* Paratyphi A Isolated from Patients with  
637 Bacteremia in Nepal. *The American Journal of Tropical Medicine and Hygiene.* The  
638 American Society of Tropical Medicine and Hygiene; 2017;97:1706–9.
- 639 18. Tonkin-Hill G, Lees JA, Bentley SD, Frost SDW, Corander J. Fast hierarchical Bayesian  
640 analysis of population structure. *Nucleic Acids Res.* 2019;47:5539–49.
- 641 19. Drummond AJ, Rambaut A. BEAST: Bayesian evolutionary analysis by sampling trees.  
642 *BMC Evolutionary Biology.* 2007;7:214.

- 643 20. Bortolaia V, Kaas RS, Ruppe E, Roberts MC, Schwarz S, Cattoir V, et al. ResFinder 4.0  
644 for predictions of phenotypes from genotypes. *Journal of Antimicrobial Chemotherapy*.  
645 2020;75:3491–500.
- 646 21. Carattoli A, Hasman H. PlasmidFinder and In Silico pMLST: Identification and Typing  
647 of Plasmid Replicons in Whole-Genome Sequencing (WGS). *Methods Mol Biol*.  
648 2020;2075:285–94.
- 649 22. Nair S, Day M, Godbole G, Saluja T, Langridge GC, Dallman TJ, et al. Genomic  
650 surveillance detects *Salmonella enterica* serovar Paratyphi A harbouring blaCTX-M-15 from  
651 a traveller returning from Bangladesh. *PLOS ONE*. Public Library of Science;  
652 2020;15:e0228250.
- 653 23. Jibril AH, Okeke IN, Dalsgaard A, Menéndez VG, Olsen JE. Genomic Analysis of  
654 Antimicrobial Resistance and Resistance Plasmids in *Salmonella* Serovars from Poultry in  
655 Nigeria. *Antibiotics*. Multidisciplinary Digital Publishing Institute; 2021;10:99.
- 656 24. Hooda Y, Sajib MSI, Rahman H, Luby SP, Bondy-Denomy J, Santosham M, et al.  
657 Molecular mechanism of azithromycin resistance among typhoidal *Salmonella* stains in  
658 Bangladesh identified through passive pediatric surveillance. *PLOS Neglected Tropical*  
659 *Diseases*. 2019;13:e0007868.
- 660 25. Sajib MSI, Tanmoy AM, Hooda Y, Rahman H, Andrews JR, Garrett DO, et al. Tracking  
661 the Emergence of Azithromycin Resistance in Multiple Genotypes of Typhoidal *Salmonella*.  
662 *mBio* [Internet]. American Society for Microbiology; 2021 [cited 2021 Feb 16];12. Available  
663 from: <https://mbio.asm.org/content/12/1/e03481-20>
- 664 26. Sahastrabudhe S, Carbis R, Wierzbza TF, Ochiai RL. Increasing rates of *Salmonella*  
665 Paratyphi A and the current status of its vaccine development. *Expert Review of Vaccines*.  
666 Taylor & Francis; 2013;12:1021–31.

- 667 27. Seif Y, Monk JM, Machado H, Kavvas E, Palsson BO. Systems Biology and Pangenome  
668 of *Salmonella* O-Antigens. mBio [Internet]. American Society for Microbiology; 2019 [cited  
669 2020 Aug 11];10. Available from: <https://mbio.asm.org/content/10/4/e01247-19>
- 670 28. Wong VK, Baker S, Pickard DJ, Parkhill J, Page AJ, Feasey NA, et al. Phylogeographical  
671 analysis of the dominant multidrug-resistant H58 clade of *Salmonella* Typhi identifies inter-  
672 and intracontinental transmission events. Nat Genet. 2015;47:632–9.
- 673 29. Wong VK, Baker S, Connor TR, Pickard D, Page AJ, Dave J, et al. An extended  
674 genotyping framework for *Salmonella enterica* serovar Typhi, the cause of human typhoid.  
675 Nature Communications. 2016;7:12827.
- 676 30. Saha SK, Baqui AH, Hanif M, Darmstadt GL, Ruhulamin M, Nagatake T, et al. Typhoid  
677 fever in Bangladesh: implications for vaccination policy. The Pediatric Infectious Disease  
678 Journal. 2001;20:521–4.
- 679 31. McClelland M, Sanderson KE, Clifton SW, Latreille P, Porwollik S, Sabo A, et al.  
680 Comparison of genome degradation in Paratyphi A and Typhi, human-restricted serovars of  
681 *Salmonella enterica* that cause typhoid. Nature Genetics. Nature Publishing Group;  
682 2004;36:1268–74.
- 683 32. Holt KE, Thomson NR, Wain J, Langridge GC, Hasan R, Bhutta ZA, et al. Pseudogene  
684 accumulation in the evolutionary histories of *Salmonella enterica* serovars Paratyphi A and  
685 Typhi. BMC Genomics. 2009;10:36.
- 686 33. Bolger AM, Lohse M, Usadel B. Trimmomatic: a flexible trimmer for Illumina sequence  
687 data. Bioinformatics. 2014;30:2114–20.
- 688 34. Wick RR, Judd LM, Gorrie CL, Holt KE. Unicycler: Resolving bacterial genome  
689 assemblies from short and long sequencing reads. PLOS Computational Biology. Public  
690 Library of Science; 2017;13:e1005595.

- 691 35. Seemann T. Prokka: rapid prokaryotic genome annotation. *Bioinformatics*.  
692 2014;30:2068–9.
- 693 36. Page AJ, Cummins CA, Hunt M, Wong VK, Reuter S, Holden MTG, et al. Roary: rapid  
694 large-scale prokaryote pan genome analysis. *Bioinformatics*. 2015;31:3691–3.
- 695 37. Langmead B, Salzberg SL. Fast gapped-read alignment with Bowtie 2. *Nature Methods*.  
696 Nature Publishing Group; 2012;9:357–9.
- 697 38. Li H, Handsaker B, Wysoker A, Fennell T, Ruan J, Homer N, et al. The Sequence  
698 Alignment/Map format and SAMtools. *Bioinformatics*. 2009;25:2078–9.
- 699 39. Croucher NJ, Page AJ, Connor TR, Delaney AJ, Keane JA, Bentley SD, et al. Rapid  
700 phylogenetic analysis of large samples of recombinant bacterial whole genome sequences  
701 using Gubbins. *Nucleic Acids Research*. 2015;43:e15–e15.
- 702 40. Letunic I, Bork P. Interactive Tree Of Life (iTOL) v4: recent updates and new  
703 developments. *Nucleic Acids Research*. 2019;47:W256–9.
- 704 41. Suchard MA, Lemey P, Baele G, Ayres DL, Drummond AJ, Rambaut A. Bayesian  
705 phylogenetic and phylodynamic data integration using BEAST 1.10. *Virus Evolution*  
706 [Internet]. 2018 [cited 2021 Mar 28];4. Available from: <https://doi.org/10.1093/ve/vey016>  
707

708 **Figure legends**

709 **Figure 1: Genotyping scheme for *Salmonella* Paratyphi A.** The scheme is composed of  
710 three primary, nine secondary and 18 genotypes on a phylogenetic tree of 1,379 isolates. The  
711 9 secondary clades as highlighted by the coloring of the inner ring. 18 genotypes identified  
712 and are shown in the colored middle ring of the figure. The previously proposed lineage  
713 system is shown in the outer ring.

714

715 **Figure 2: Maximum clade credibility tree of 315 representative *Salmonella* Paratyphi A**  
716 **isolates.** The tree shows the last common ancestor of all *Salmonella* Paratyphi A existed at  
717 least 600 years ago (tMRCA - 1407 AD). The different genotypes are temporally resolved.  
718 Countries with greater than or equal to 5 isolates are also included.

719

720 **Figure 3: Geographical distribution of *Salmonella* Paratyphi A genotypes.** The country  
721 of isolation for 1378 sequenced *Salmonella* Paratyphi A isolates is shown. The distribution of  
722 genotypes per country is shown as scattered pie charts. The size of the each pie chart  
723 represents the number of sequences available. A difference in circulating genotypes is  
724 observed indicating local populations differ in several endemic countries. Further details are  
725 provided in Additional file 2.

726

727 **Figure 4: Presence of antimicrobial resistance genes, plasmids, and chromosomal**  
728 **mutations linked to quinolone resistance across different *Salmonella* Paratyphi A**  
729 **genotypes.** The diversity of **a)** Antimicrobial resistance genes **b)** Plasmids and **c)** quinolone  
730 resistance determining region (QRDR) mutations present *Salmonella* Paratyphi A is shown.

731





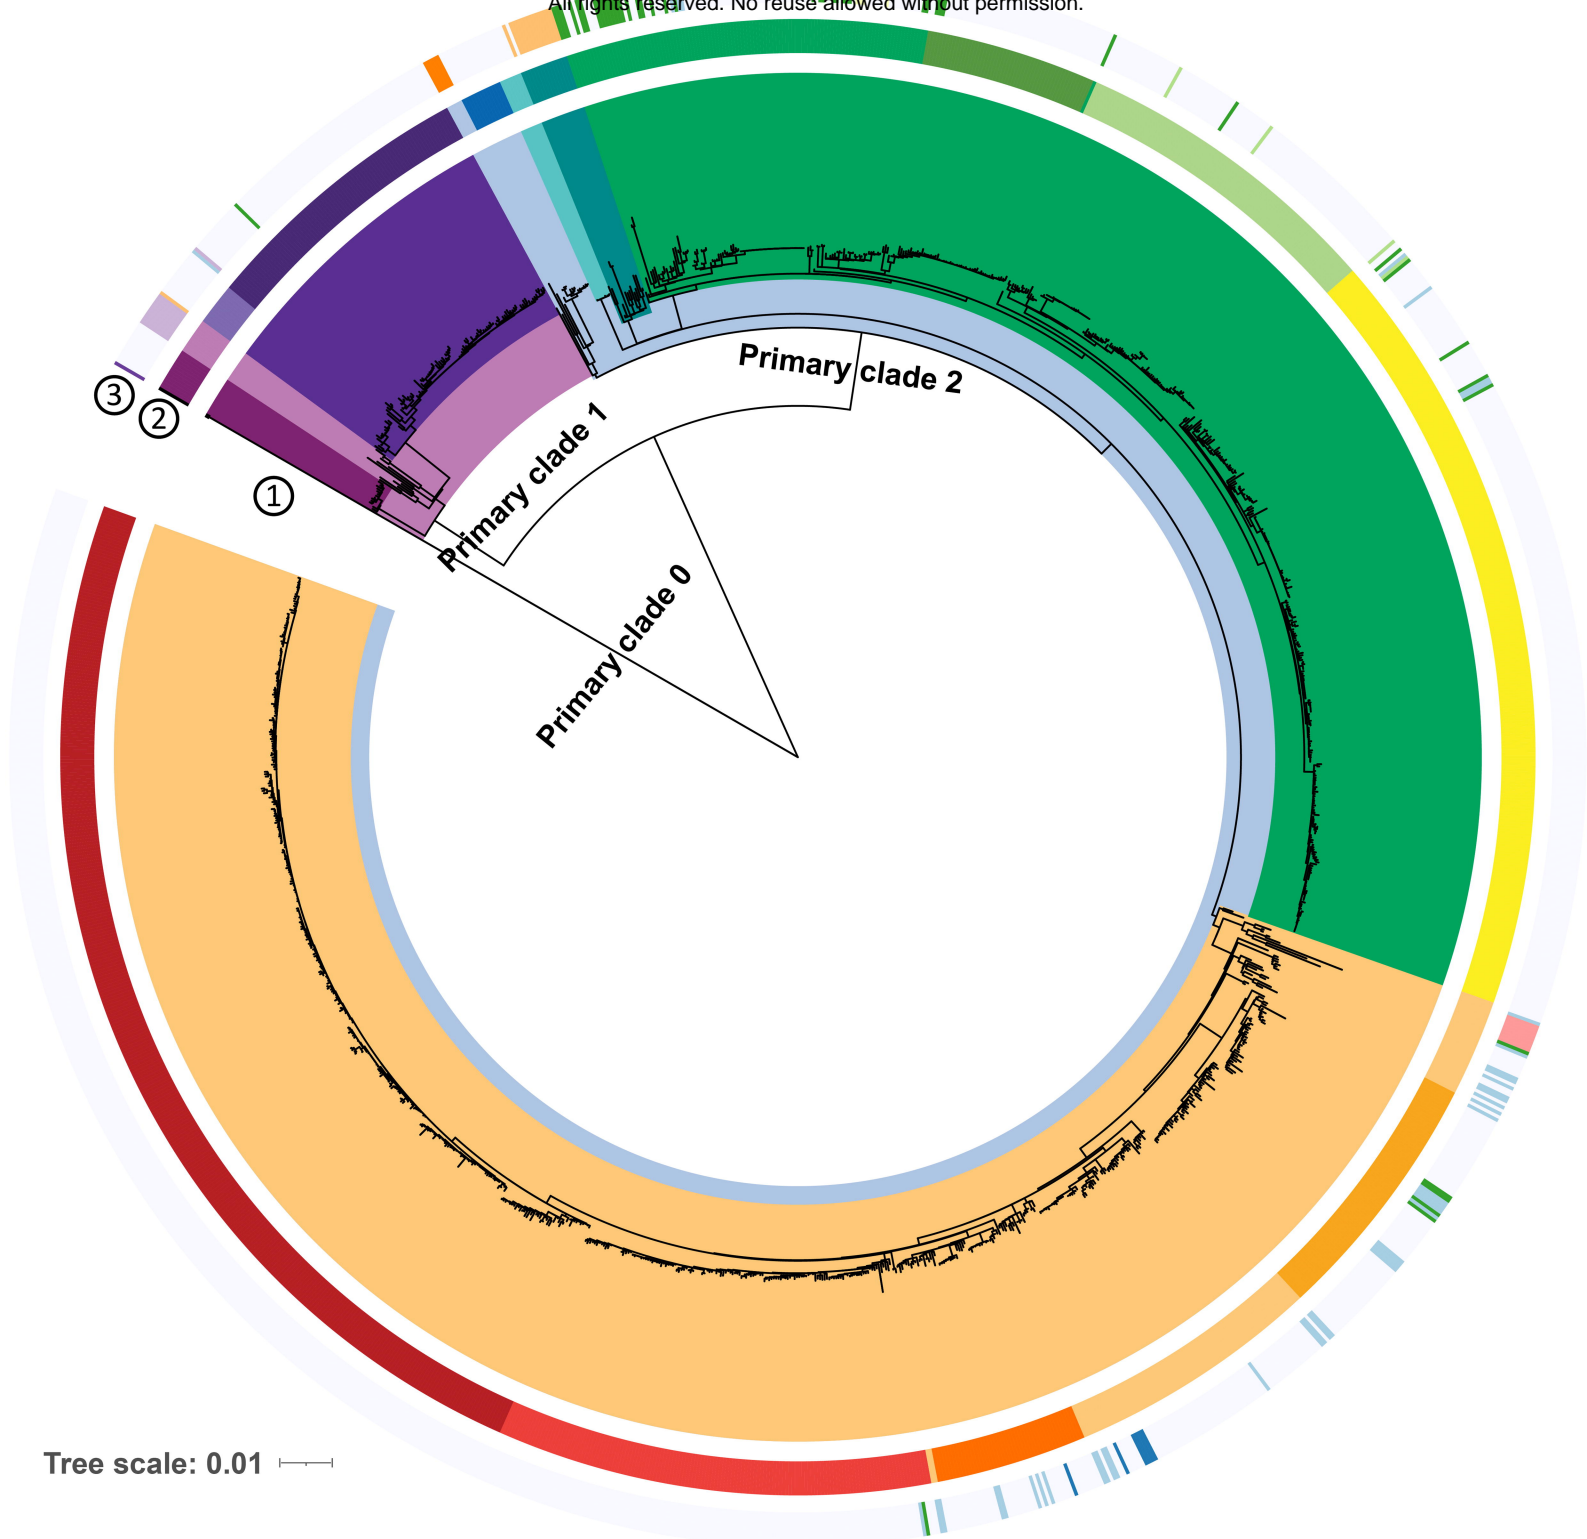

Tree scale: 0.01

① Secondary Clades

|     |     |
|-----|-----|
| 0.1 | 2.1 |
| 1.0 | 2.2 |
| 1.1 | 2.3 |
| 1.2 | 2.4 |
| 2.0 |     |

② Genotypes

|       |       |       |       |
|-------|-------|-------|-------|
| 0.1   | 2.0   | 2.3.1 | 2.4.2 |
| 1.0   | 2.0.1 | 2.3.2 | 2.4.3 |
| 1.1   | 2.1   | 2.3.3 | 2.4.4 |
| 1.2.1 | 2.2   | 2.4   |       |
| 1.2.2 | 2.3   | 2.4.1 |       |

③ Lineages

|    |    |    |
|----|----|----|
| A  | C5 | NA |
| A1 | D  |    |
| B  | E  |    |
| C  | F  |    |
| C4 | G  |    |

1407 1443 1479 1515 1551 1587 1623 1659 1695 1731 1767 1803 1839 1875 1911 1947 1983 2019

**Country**

medRxiv preprint doi: <https://doi.org/10.1101/2021.11.21.266165>; this version posted November 28, 2021. The copyright holder for this preprint (which was not certified by peer review) is the author/funder, who has granted medRxiv a license to display the preprint in perpetuity. All rights reserved. No reuse allowed without permission.

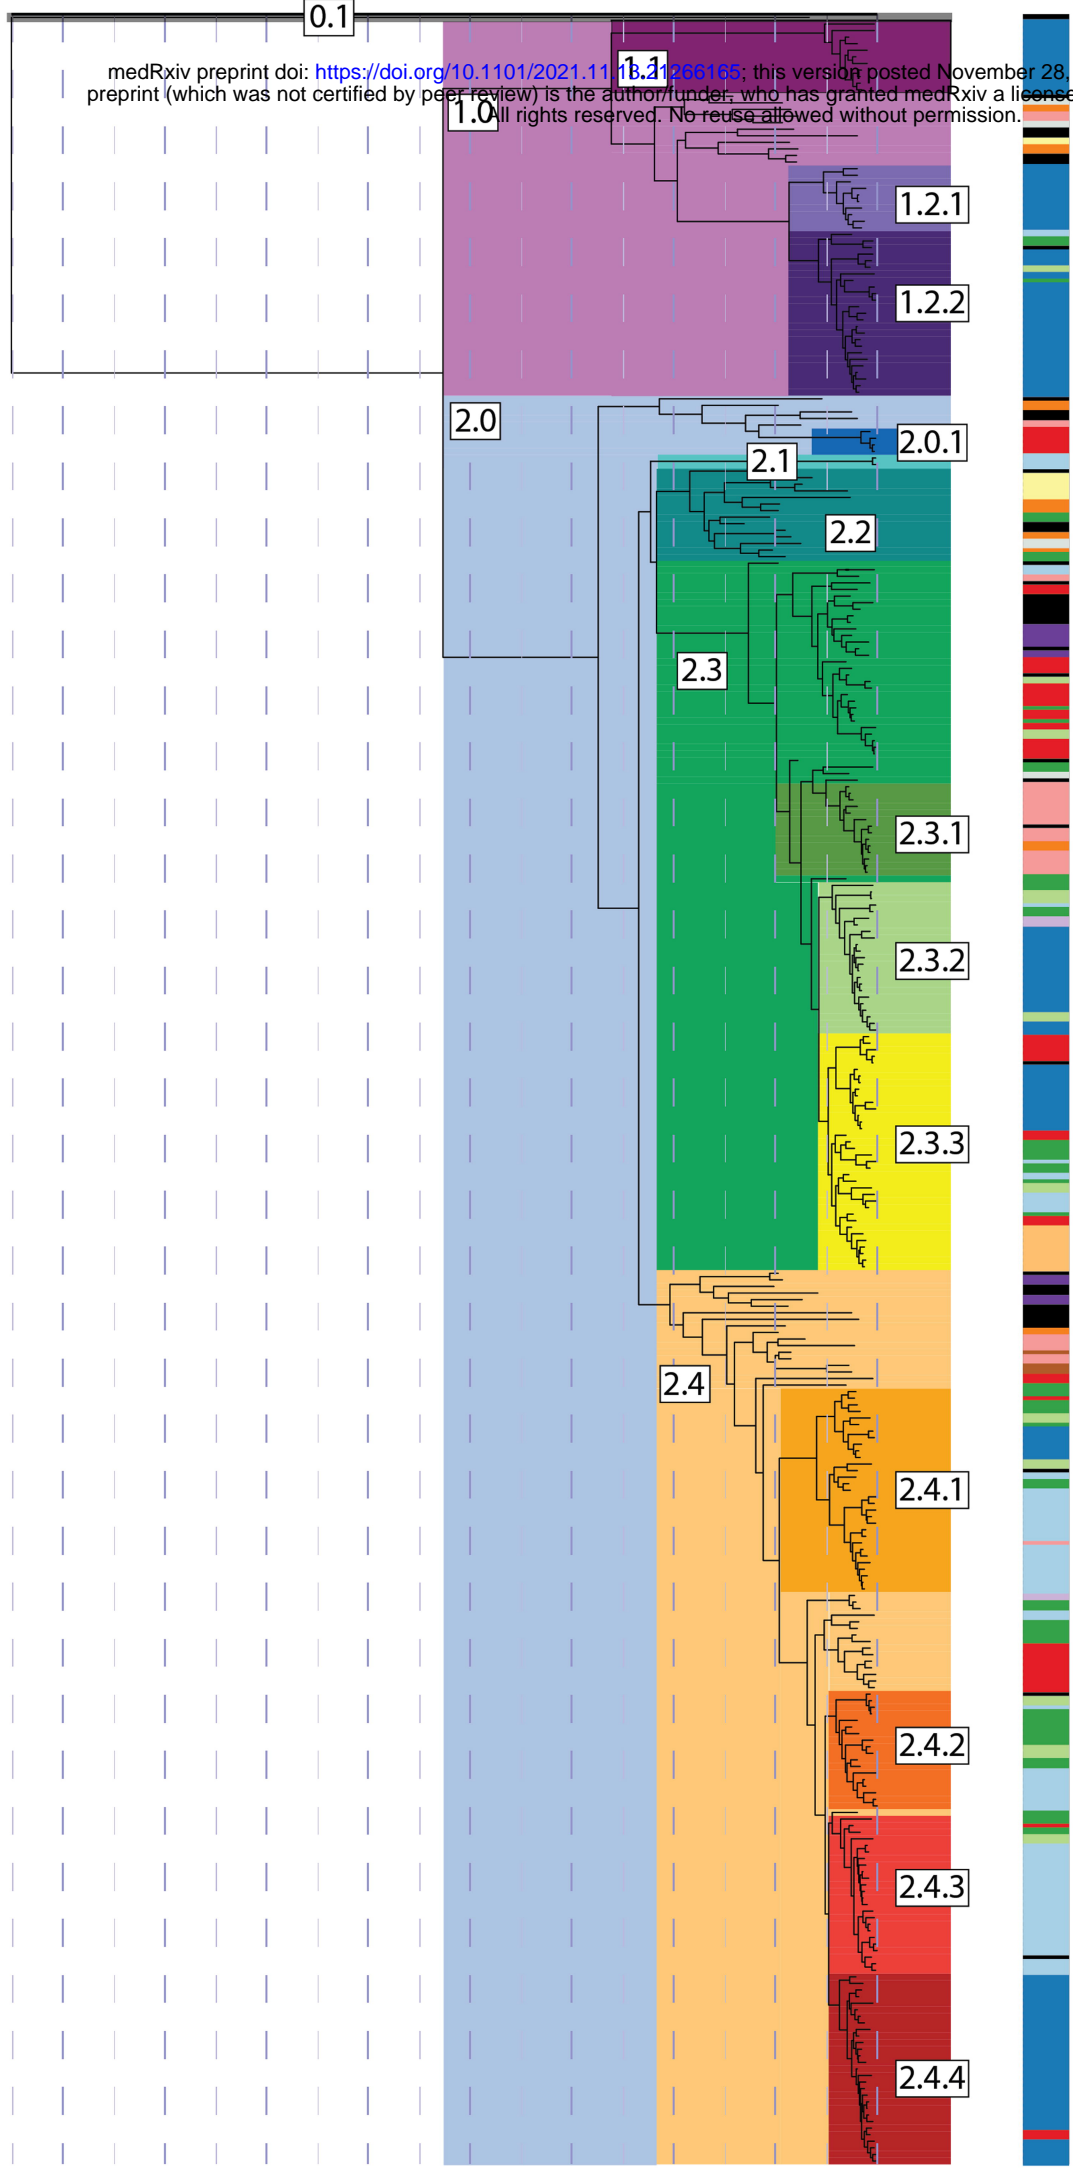

**Genotypes**

- 0.1
- 1.0
- 1.1
- 1.2.1
- 1.2.2
- 2.0
- 2.0.1
- 2.1
- 2.2
- 2.3
- 2.3.1
- 2.3.2
- 2.3.3
- 2.4
- 2.4.1
- 2.4.2
- 2.4.3
- 2.4.4

**Country (≥5 isolates)**

- Bangladesh
- India
- Nepal
- UK
- Cambodia
- Pakistan
- China
- France
- Myanmar
- Senegal
- Morocco
- Indonesia
- Turkey
- Others

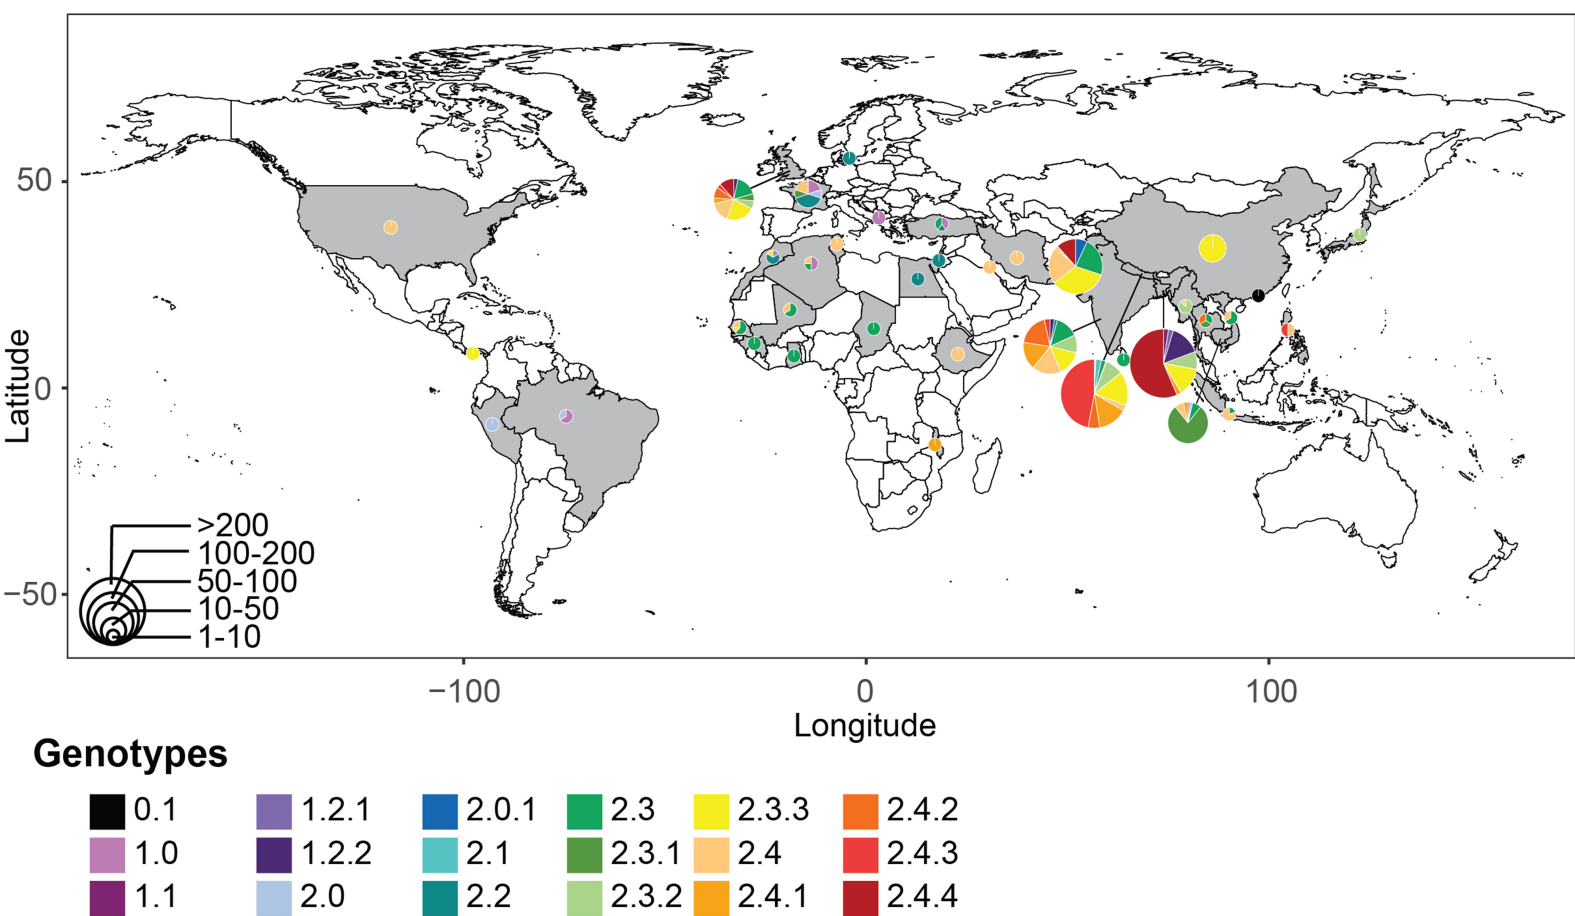

**a**

**Resistant genes**

- blaCTX-M-15,blaTEM-1B
- blaTEM-116
- blaTEM-1B,catA1,sul1,sul2,tet(B),dfrA7
- catA1
- catA1,sul1,sul2,tet(B),dfrA7
- qnrB19
- sul2
- No resistant genes

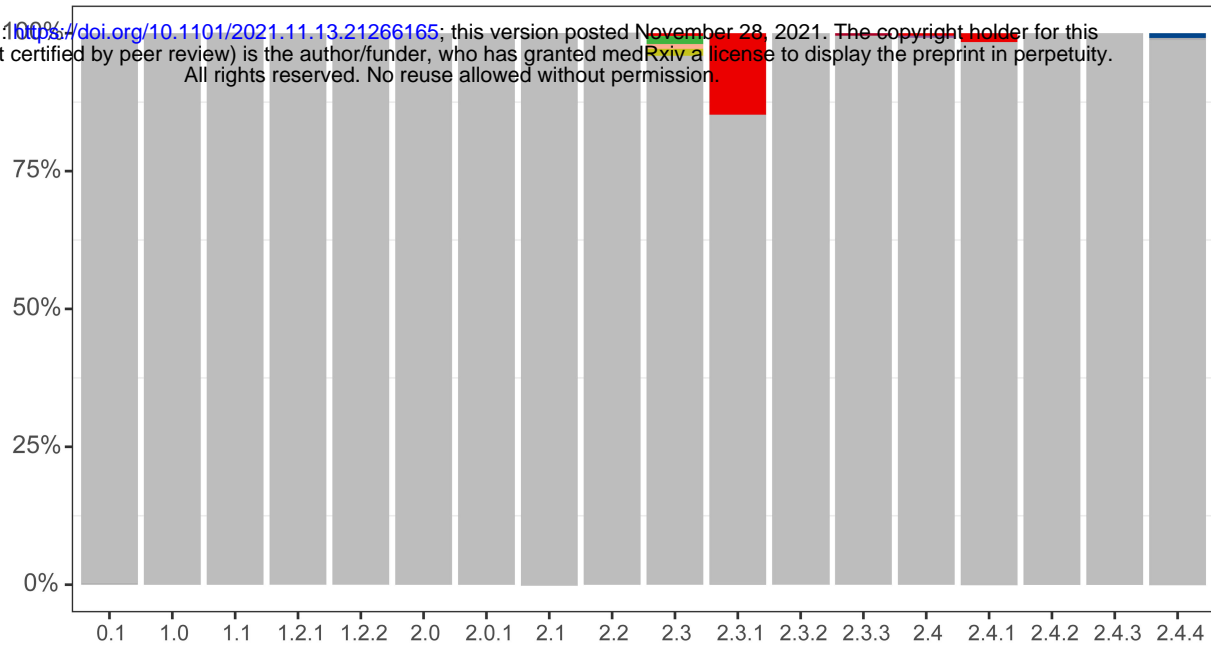

**b**

**Plasmids**

- Col(BS512)
- Col(pHAD28)
- ColpVC
- ColRNAI
- IncFIB(pHCM2)
- IncFIB(pHCM2),Col(pHAD28)
- IncFIB(pHCM2),IncX1
- Col(pHAD28)
- IncFII
- IncHI1
- IncI1-I
- IncQ1,IncHI1
- IncX1
- IncX1,ColpVC
- No plasmids

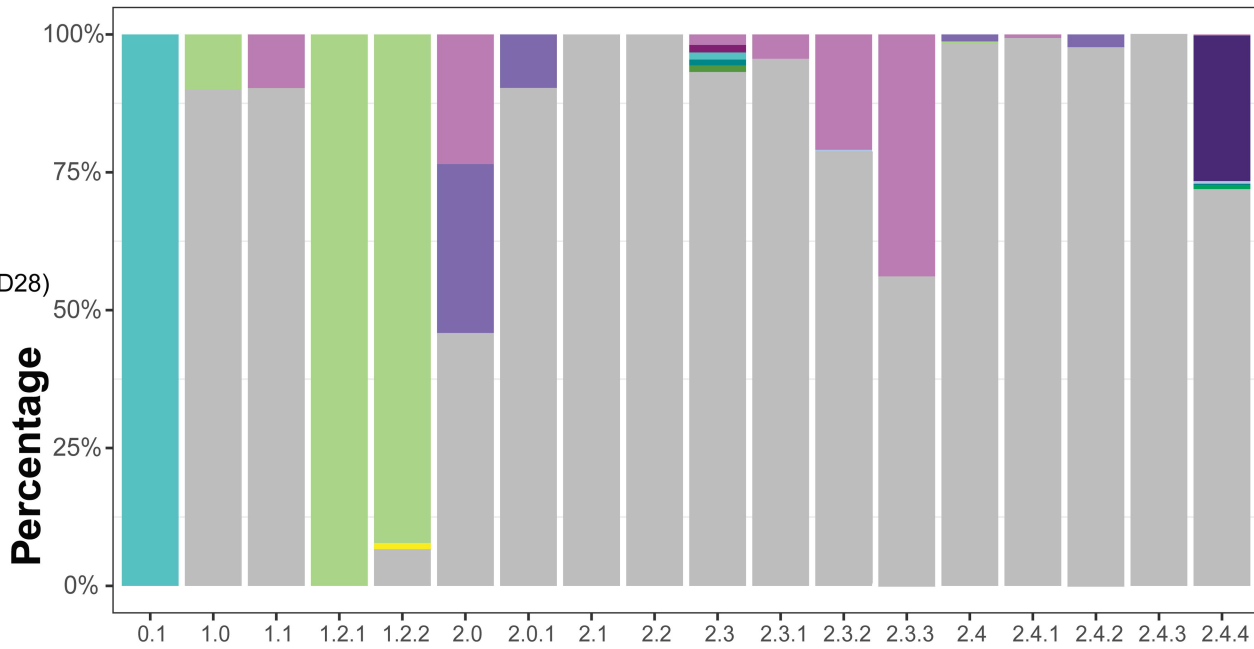

**c**

**QRDR mutations**

- gyrA-D87G
- gyrA-D87N
- gyrA-D87Y
- gyrA-S83F
- gyrA-S83F, gyrA-D87G
- gyrA-S83F, gyrA-D87N
- gyrA-S83Y
- No mutations

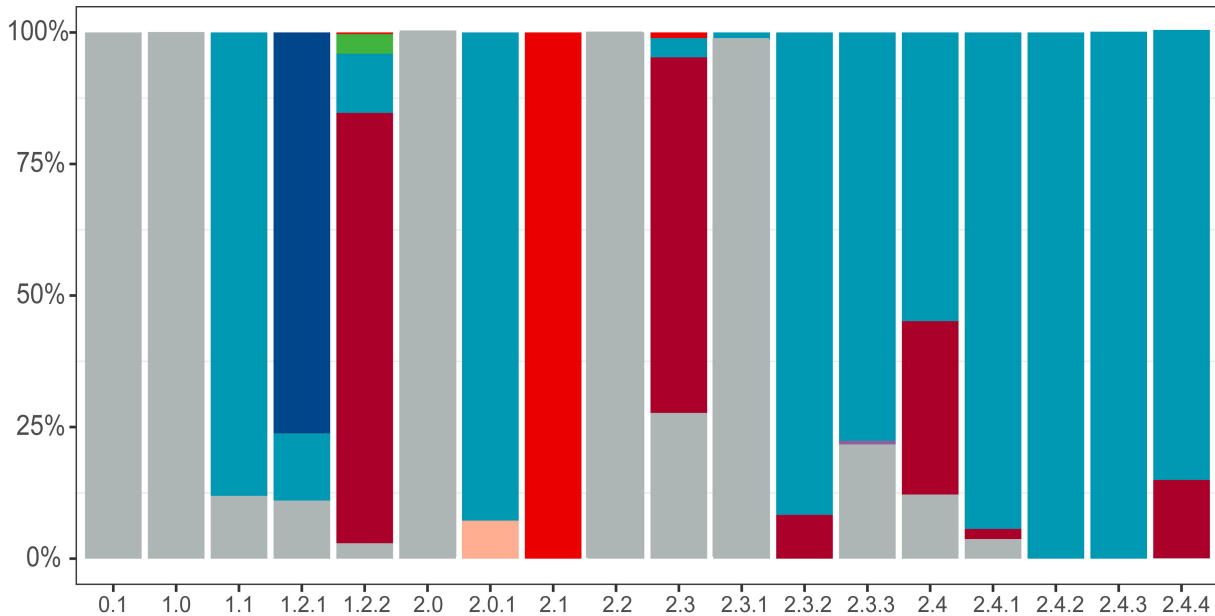

**Genotypes**
